# Supplementary material
Source: ML conference proceedings conference paper supplement (https://proceedings.mlr.press/v38/kveton15.html)
Supplement: Supplementary file [file kveton15-supp.pdf]

## A Proofs of Main Theorems

### A.1 Proof of Lemma 1

Let  $R_t = R(A_t, w_t)$  be the stochastic regret of CombUCB1 at time  $t$ , where  $A_t$  and  $w_t$  are the solution and the weights of the items at time  $t$ , respectively. Furthermore, let  $\mathcal{E}_t = \{\exists e \in E : |\bar{w}(e) - \hat{w}_{T_{t-1}(e)}(e)| \geq c_{t-1, T_{t-1}(e)}\}$  be the event that  $\bar{w}(e)$  is outside of the high-probability confidence interval around  $\hat{w}_{T_{t-1}(e)}(e)$  for some item  $e$  at time  $t$ ; and let  $\bar{\mathcal{E}}_t$  be the complement of  $\mathcal{E}_t$ ,  $\bar{w}(e)$  is in the high-probability confidence interval around  $\hat{w}_{T_{t-1}(e)}(e)$  for all  $e$  at time  $t$ . Then we can decompose the regret of CombUCB1 as:

$$R(n) = \mathbb{E} \left[ \sum_{t=1}^{t_0-1} R_t \right] + \mathbb{E} \left[ \sum_{t=t_0}^n \mathbb{1}\{\mathcal{E}_t\} R_t \right] + \mathbb{E} \left[ \sum_{t=t_0}^n \mathbb{1}\{\bar{\mathcal{E}}_t\} R_t \right].$$

Now we bound each term in our regret decomposition.

The regret of the initialization,  $\mathbb{E} \left[ \sum_{t=1}^{t_0-1} R_t \right]$ , is bounded by  $KL$  because Algorithm 2 terminates in at most  $L$  steps, and  $R_t \leq K$  for any  $A_t$  and  $w_t$ .

The second term in our regret decomposition,  $\mathbb{E} \left[ \sum_{t=t_0}^n \mathbb{1}\{\mathcal{E}_t\} R_t \right]$ , is small because all of our confidence intervals hold with high probability. In particular, for any  $e, s$ , and  $t$ :

$$P(|\bar{w}(e) - \hat{w}_s(e)| \geq c_{t,s}) \leq 2 \exp[-3 \log t],$$

and therefore:

$$\mathbb{E} \left[ \sum_{t=t_0}^n \mathbb{1}\{\mathcal{E}_t\} \right] \leq \sum_{e \in E} \sum_{t=1}^n \sum_{s=1}^t P(|\bar{w}(e) - \hat{w}_s(e)| \geq c_{t,s}) \leq 2 \sum_{e \in E} \sum_{t=1}^n \sum_{s=1}^t \exp[-3 \log t] \leq 2 \sum_{e \in E} \sum_{t=1}^n t^{-2} \leq \frac{\pi^2}{3} L.$$

Since  $R_t \leq K$  for any  $A_t$  and  $w_t$ ,  $\mathbb{E} \left[ \sum_{t=t_0}^n \mathbb{1}\{\mathcal{E}_t\} R_t \right] \leq \frac{\pi^2}{3} KL$ .

Finally, we rewrite the last term in our regret decomposition as:

$$\mathbb{E} \left[ \sum_{t=t_0}^n \mathbb{1}\{\bar{\mathcal{E}}_t\} R_t \right] \stackrel{(a)}{=} \sum_{t=t_0}^n \mathbb{E} [\mathbb{1}\{\bar{\mathcal{E}}_t\} \mathbb{E} [R_t | A_t]] \stackrel{(b)}{=} \mathbb{E} \left[ \sum_{t=t_0}^n \Delta_{A_t} \mathbb{1}\{\bar{\mathcal{E}}_t, \Delta_{A_t} > 0\} \right].$$

In equality (a), the outer expectation is over the history of the agent up to time  $t$ , which in turn determines  $A_t$  and  $\bar{\mathcal{E}}_t$ ; and  $\mathbb{E} [R_t | A_t]$  is the expected regret at time  $t$  conditioned on solution  $A_t$ . Equality (b) follows from  $\Delta_{A_t} = \mathbb{E} [R_t | A_t]$ . Now we bound  $\Delta_{A_t} \mathbb{1}\{\bar{\mathcal{E}}_t, \Delta_{A_t} > 0\}$  for any suboptimal  $A_t$ . The bound is derived based on two facts. First, when CombUCB1 chooses  $A_t$ ,  $f(A_t, U_t) \geq f(A^*, U_t)$ . This further implies that  $\sum_{e \in A_t \setminus A^*} U_t(e) \geq \sum_{e \in A^* \setminus A_t} U_t(e)$ . Second, when event  $\bar{\mathcal{E}}_t$  happens,  $|\bar{w}(e) - \hat{w}_{T_{t-1}(e)}(e)| < c_{t-1, T_{t-1}(e)}$  for all items  $e$ . Therefore:

$$\sum_{e \in A_t \setminus A^*} \bar{w}(e) + 2 \sum_{e \in A_t \setminus A^*} c_{t-1, T_{t-1}(e)} \geq \sum_{e \in A_t \setminus A^*} U_t(e) \geq \sum_{e \in A^* \setminus A_t} U_t(e) \geq \sum_{e \in A^* \setminus A_t} \bar{w}(e),$$

and  $2 \sum_{e \in A_t \setminus A^*} c_{t-1, T_{t-1}(e)} \geq \Delta_{A_t}$  follows from the observation that  $\Delta_{A_t} = \sum_{e \in A^* \setminus A_t} \bar{w}(e) - \sum_{e \in A_t \setminus A^*} \bar{w}(e)$ . Now note that  $c_{n, T_{t-1}(e)} \geq c_{t-1, T_{t-1}(e)}$  for any time  $t \leq n$ . Therefore, the event  $\mathcal{F}_t$  in (3) must happen and:

$$\mathbb{E} \left[ \sum_{t=t_0}^n \Delta_{A_t} \mathbb{1}\{\bar{\mathcal{E}}_t, \Delta_{A_t} > 0\} \right] \leq \mathbb{E} \left[ \sum_{t=t_0}^n \Delta_{A_t} \mathbb{1}\{\mathcal{F}_t\} \right].$$

This concludes our proof.

### A.2 Proof of Theorem 2

By Lemma 1, it remains to bound  $\hat{R}(n) = \sum_{t=t_0}^n \Delta_{A_t} \mathbb{1}\{\mathcal{F}_t\}$ , where the event  $\mathcal{F}_t$  is defined in (3). By Lemma 2 and from the assumption that  $\Delta_{A_t} = \Delta$  for all suboptimal  $A_t$ , it follows that:

$$\hat{R}(n) = \Delta \sum_{t=t_0}^n \mathbb{1}\{\mathcal{F}_t\} = \Delta \sum_{t=t_0}^n \mathbb{1}\{G_{1,t}, \Delta_{A_t} > 0\} + \Delta \sum_{t=t_0}^n \mathbb{1}\{G_{2,t}, \Delta_{A_t} > 0\}.$$

To bound the above quantity, it is sufficient to bound the number of times that events  $G_{1,t}$  and  $G_{2,t}$  happen. Then we set the tunable parameters  $d$  and  $\alpha$  such that the two counts are of the same magnitude.

**Claim 1.** *Event  $G_{1,t}$  happens at most  $\frac{\alpha}{d}K^2L\frac{6}{\Delta^2}\log n$  times.*

*Proof.* Recall that event  $G_{1,t}$  can happen only if at least  $d$  chosen suboptimal items are not observed “sufficiently often” up to time  $t$ ,  $T_{t-1}(e) \leq \alpha K^2 \frac{6}{\Delta^2} \log n$  for at least  $d$  items in  $\tilde{A}_t$ . After the event happens, the observation counters of these items increase by one. Therefore, after the event happens  $\frac{\alpha}{d}K^2L\frac{6}{\Delta^2}\log n$  times, all suboptimal items are guaranteed to be observed at least  $\alpha K^2 \frac{6}{\Delta^2} \log n$  times and  $G_{1,t}$  cannot happen anymore. ■

**Claim 2.** *Event  $G_{2,t}$  happens at most  $\frac{\alpha d^2}{(\sqrt{\alpha}-1)^2}L\frac{6}{\Delta^2}\log n$  times.*

*Proof.* Event  $G_{2,t}$  can happen only if there exists  $e \in \tilde{A}_t$  such that  $T_{t-1}(e) \leq \frac{\alpha d^2}{(\sqrt{\alpha}-1)^2} \frac{6}{\Delta^2} \log n$ . After the event happens, the observation counter of item  $e$  increases by one. Therefore, the number of times that event  $G_{2,t}$  can happen is bounded trivially by  $\frac{\alpha d^2}{(\sqrt{\alpha}-1)^2}L\frac{6}{\Delta^2}\log n$ . ■

Based on Claims 1 and 2,  $\hat{R}(n)$  is bounded as:

$$\hat{R}(n) \leq \left( \frac{\alpha}{d}K^2 + \frac{\alpha d^2}{(\sqrt{\alpha}-1)^2} \right) L \frac{6}{\Delta} \log n.$$

Finally, we choose  $\alpha = 4$  and  $d = K^{\frac{2}{3}}$ ; and it follows that the regret is bounded as:

$$R(n) \leq \mathbb{E} \left[ \hat{R}(n) \right] + \left( \frac{\pi^2}{3} + 1 \right) KL \leq K^{\frac{4}{3}}L \frac{48}{\Delta} \log n + \left( \frac{\pi^2}{3} + 1 \right) KL.$$

### A.3 Proof of Theorem 3

Let  $\mathcal{F}_t$  be the event in (3). By Lemmas 1 and 2, it remains to bound:

$$\hat{R}(n) = \sum_{t=t_0}^n \Delta_{A_t} \mathbb{1}\{\mathcal{F}_t\} = \sum_{t=t_0}^n \Delta_{A_t} \mathbb{1}\{G_{1,t}, \Delta_{A_t} > 0\} + \sum_{t=t_0}^n \Delta_{A_t} \mathbb{1}\{G_{2,t}, \Delta_{A_t} > 0\}.$$

In the next step, we introduce item-specific variants of events  $G_{1,t}$  (6) and  $G_{2,t}$  (7), and then associate the regret at time  $t$  with these events. In particular, let:

$$G_{e,1,t} = G_{1,t} \cap \left\{ e \in \tilde{A}_t, T_{t-1}(e) \leq \alpha K^2 \frac{6}{\Delta_{A_t}^2} \log n \right\} \quad (14)$$

$$G_{e,2,t} = G_{2,t} \cap \left\{ e \in \tilde{A}_t, T_{t-1}(e) \leq \frac{\alpha d^2}{(\sqrt{\alpha}-1)^2} \frac{6}{\Delta_{A_t}^2} \log n \right\} \quad (15)$$

be the events that item  $e$  is not observed “sufficiently often” under events  $G_{1,t}$  and  $G_{2,t}$ , respectively. Then by the definitions of the above events, it follows that:

$$\begin{aligned} \mathbb{1}\{G_{1,t}, \Delta_{A_t} > 0\} &\leq \frac{1}{d} \sum_{e \in \tilde{E}} \mathbb{1}\{G_{e,1,t}, \Delta_{A_t} > 0\} \\ \mathbb{1}\{G_{2,t}, \Delta_{A_t} > 0\} &\leq \sum_{e \in \tilde{E}} \mathbb{1}\{G_{e,2,t}, \Delta_{A_t} > 0\}, \end{aligned}$$

where  $\tilde{E} = E \setminus A^*$  is the set of suboptimal items; and we bound  $\hat{R}(n)$  as:

$$\hat{R}(n) \leq \sum_{e \in \tilde{E}} \sum_{t=t_0}^n \mathbb{1}\{G_{e,1,t}, \Delta_{A_t} > 0\} \frac{\Delta_{A_t}}{d} + \sum_{e \in \tilde{E}} \sum_{t=t_0}^n \mathbb{1}\{G_{e,2,t}, \Delta_{A_t} > 0\} \Delta_{A_t}.$$

Let each item  $e$  be contained in  $N_e$  suboptimal solutions and  $\Delta_{e,1} \geq \dots \geq \Delta_{e,N_e}$  be the gaps of these solutions, ordered from the largest gap to the smallest one. Then  $\hat{R}(n)$  can be further bounded as:

$$\begin{aligned}
 \hat{R}(n) &\leq \sum_{e \in \tilde{E}} \sum_{t=t_0}^n \sum_{k=1}^{N_e} \mathbb{1}\{G_{e,1,t}, \Delta_{A_t} = \Delta_{e,k}\} \frac{\Delta_{e,k}}{d} + \sum_{e \in \tilde{E}} \sum_{t=t_0}^n \sum_{k=1}^{N_e} \mathbb{1}\{G_{e,2,t}, \Delta_{A_t} = \Delta_{e,k}\} \Delta_{e,k} \\
 &\stackrel{(a)}{\leq} \sum_{e \in \tilde{E}} \sum_{t=t_0}^n \sum_{k=1}^{N_e} \mathbb{1}\left\{e \in \tilde{A}_t, T_{t-1}(e) \leq \alpha K^2 \frac{6}{\Delta_{e,k}^2} \log n, \Delta_{A_t} = \Delta_{e,k}\right\} \frac{\Delta_{e,k}}{d} + \\
 &\quad \sum_{e \in \tilde{E}} \sum_{t=t_0}^n \sum_{k=1}^{N_e} \mathbb{1}\left\{e \in \tilde{A}_t, T_{t-1}(e) \leq \frac{\alpha d^2}{(\sqrt{\alpha}-1)^2} \frac{6}{\Delta_{e,k}^2} \log n, \Delta_{A_t} = \Delta_{e,k}\right\} \Delta_{e,k} \\
 &\stackrel{(b)}{\leq} \sum_{e \in \tilde{E}} \frac{6\alpha K^2 \log n}{d} \left[ \Delta_{e,1} \frac{1}{\Delta_{e,1}^2} + \sum_{k=2}^{N_e} \Delta_{e,k} \left( \frac{1}{\Delta_{e,k}^2} - \frac{1}{\Delta_{e,k-1}^2} \right) \right] + \\
 &\quad \sum_{e \in \tilde{E}} \frac{6\alpha d^2 \log n}{(\sqrt{\alpha}-1)^2} \left[ \Delta_{e,1} \frac{1}{\Delta_{e,1}^2} + \sum_{k=2}^{N_e} \Delta_{e,k} \left( \frac{1}{\Delta_{e,k}^2} - \frac{1}{\Delta_{e,k-1}^2} \right) \right] \\
 &\stackrel{(c)}{<} \sum_{e \in \tilde{E}} \left( \frac{\alpha}{d} K^2 + \frac{\alpha d^2}{(\sqrt{\alpha}-1)^2} \right) \frac{12}{\Delta_{e,\min}} \log n,
 \end{aligned}$$

where inequality (a) is by the definitions of events  $G_{e,1,t}$  and  $G_{e,2,t}$ , inequality (b) is from the solution to:

$$\max_{A_1, \dots, A_n} \sum_{t=t_0}^n \sum_{k=1}^{N_e} \mathbb{1}\left\{e \in \tilde{A}_t, T_{t-1}(e) \leq \frac{C}{\Delta_{e,k}^2} \log n, \Delta_{A_t} = \Delta_{e,k}\right\} \Delta_{e,k}$$

for appropriate  $C$ , and inequality (c) follows from Lemma 3 of Kveton *et al.* [12]:

$$\left[ \Delta_{e,1} \frac{1}{\Delta_{e,1}^2} + \sum_{k=2}^{N_e} \Delta_{e,k} \left( \frac{1}{\Delta_{e,k}^2} - \frac{1}{\Delta_{e,k-1}^2} \right) \right] < \frac{2}{\Delta_{e,N_e}} = \frac{2}{\Delta_{e,\min}}. \quad (16)$$

Finally, we choose  $\alpha = 4$  and  $d = K^{\frac{2}{3}}$ ; and it follows that the regret is bounded as:

$$R(n) \leq \mathbb{E} \left[ \hat{R}(n) \right] + \left( \frac{\pi^2}{3} + 1 \right) KL \leq \sum_{e \in \tilde{E}} K^{\frac{4}{3}} \frac{96}{\Delta_{e,\min}} \log n + \left( \frac{\pi^2}{3} + 1 \right) KL.$$

#### A.4 Proof of Theorem 4

The first step of the proof is identical to that of Theorem 2. By Lemma 1, it remains to bound  $\hat{R}(n) = \sum_{t=t_0}^n \Delta_{A_t} \mathbb{1}\{\mathcal{F}_t\}$ , where the event  $\mathcal{F}_t$  is defined in (3). By Lemma 3 and from the assumption that  $\Delta_{A_t} = \Delta$  for all suboptimal  $A_t$ , it follows that:

$$\hat{R}(n) = \Delta \sum_{t=t_0}^n \mathbb{1}\{\mathcal{F}_t\} = \Delta \sum_{i=1}^{\infty} \sum_{t=t_0}^n \mathbb{1}\{G_{i,t}, \Delta_{A_t} > 0\}.$$

Note that  $\Delta_{A_t} > 0$  implies  $\Delta_{A_t} = \Delta$ . Therefore,  $m_{i,t}$  does not depend on  $t$  and we denote it by  $m_i = \alpha_i \frac{K^2}{\Delta^2} \log n$ . Based on the same argument as in Claim 1, event  $G_{i,t}$  cannot happen more than  $\frac{Lm_i}{\beta_i K}$  times, because at least  $\beta_i K$  items that are observed at most  $m_i$  times have their observation counters incremented in each event  $G_{i,t}$ . Therefore:

$$\hat{R}(n) \leq \Delta \sum_{i=1}^{\infty} \frac{Lm_i}{\beta_i K} = KL \frac{1}{\Delta} \left[ \sum_{i=1}^{\infty} \frac{\alpha_i}{\beta_i} \right] \log n. \quad (17)$$

It remains to choose  $(\alpha_i)$  and  $(\beta_i)$  such that:

- $\lim_{i \rightarrow \infty} \alpha_i = \lim_{i \rightarrow \infty} \beta_i = 0$ ;
- Monotonicity conditions in (9) and (10) hold;
- Inequality (12) holds,  $\sqrt{6} \sum_{i=1}^{\infty} \frac{\beta_{i-1} - \beta_i}{\sqrt{\alpha_i}} \leq 1$ ;
- $\sum_{i=1}^{\infty} \frac{\alpha_i}{\beta_i}$  is minimized.

We choose  $(\alpha_i)$  and  $(\beta_i)$  to be geometric sequences,  $\beta_i = \beta^i$  and  $\alpha_i = d\alpha^i$  for  $0 < \alpha, \beta < 1$  and  $d > 0$ . For this setting,  $\alpha_i \rightarrow 0$  and  $\beta_i \rightarrow 0$ , and the monotonicity conditions are also satisfied. Moreover, if  $\beta < \sqrt{\alpha}$ , we have:

$$\sqrt{6} \sum_{i=1}^{\infty} \frac{\beta_{i-1} - \beta_i}{\sqrt{\alpha_i}} = \sqrt{6} \sum_{i=1}^{\infty} \frac{\beta^{i-1} - \beta^i}{\sqrt{d\alpha^i}} = \sqrt{\frac{6}{d}} \frac{1 - \beta}{\sqrt{\alpha - \beta}} \leq 1$$

provided that  $d \geq 6 \left( \frac{1 - \beta}{\sqrt{\alpha - \beta}} \right)^2$ . Furthermore, if  $\alpha < \beta$ , we have:

$$\sum_{i=1}^{\infty} \frac{\alpha_i}{\beta_i} = \sum_{i=1}^{\infty} \frac{d\alpha^i}{\beta^i} = \frac{d\alpha}{\beta - \alpha}.$$

Given the above, the best choice of  $d$  is  $6 \left( \frac{1 - \beta}{\sqrt{\alpha - \beta}} \right)^2$  and the problem of minimizing the constant in our regret bound can be written as:

$$\begin{aligned} \inf_{\alpha, \beta} \quad & 6 \left( \frac{1 - \beta}{\sqrt{\alpha - \beta}} \right)^2 \frac{\alpha}{\beta - \alpha} \\ \text{s.t.} \quad & 0 < \alpha < \beta < \sqrt{\alpha} < 1. \end{aligned}$$

We find the solution to the above problem numerically, and determine it to be  $\alpha = 0.1459$  and  $\beta = 0.2360$ . For these  $\alpha$  and  $\beta$ ,  $6 \left( \frac{1 - \beta}{\sqrt{\alpha - \beta}} \right)^2 \frac{\alpha}{\beta - \alpha} < 267$ . We apply this upper bound to (17) and it follows that the regret is bounded as:

$$R(n) \leq \mathbb{E} [\hat{R}(n)] + \left( \frac{\pi^2}{3} + 1 \right) KL \leq KL \frac{267}{\Delta} \log n + \left( \frac{\pi^2}{3} + 1 \right) KL.$$

## A.5 Proof of Theorem 5

Let  $\mathcal{F}_t$  be the event in (3). By Lemmas 1 and 3, it remains to bound:

$$\hat{R}(n) = \sum_{t=t_0}^n \Delta_{A_t} \mathbb{1}\{\mathcal{F}_t\} = \sum_{i=1}^{\infty} \sum_{t=t_0}^n \Delta_{A_t} \mathbb{1}\{G_{i,t}, \Delta_{A_t} > 0\}.$$

In the next step, we define item-specific variants of events  $G_{i,t}$  (11) and associate the regret at time  $t$  with these events. In particular, let:

$$G_{e,i,t} = G_{i,t} \cap \left\{ e \in \tilde{A}_t, T_{t-1}(e) \leq m_{i,t} \right\} \quad (18)$$

be the event that item  $e$  is not observed “sufficiently often” under event  $G_{i,t}$ . Then it follows that:

$$\mathbb{1}\{G_{i,t}, \Delta_{A_t} > 0\} \leq \frac{1}{\beta_i K} \sum_{e \in \tilde{E}} \mathbb{1}\{G_{e,i,t}, \Delta_{A_t} > 0\},$$

because at least  $\beta_i K$  items are not observed “sufficiently often” under event  $G_{i,t}$ . Therefore, we can bound  $\hat{R}(n)$  as:

$$\hat{R}(n) \leq \sum_{e \in \tilde{E}} \sum_{i=1}^{\infty} \sum_{t=t_0}^n \mathbb{1}\{G_{e,i,t}, \Delta_{A_t} > 0\} \frac{\Delta_{A_t}}{\beta_i K}.$$

Let each item  $e$  be contained in  $N_e$  suboptimal solutions and  $\Delta_{e,1} \geq \dots \geq \Delta_{e,N_e}$  be the gaps of these solutions, ordered from the largest gap to the smallest one. Then  $\hat{R}(n)$  can be further bounded as:

$$\begin{aligned}
 \hat{R}(n) &\leq \sum_{e \in \tilde{E}} \sum_{i=1}^{\infty} \sum_{t=t_0}^n \sum_{k=1}^{N_e} \mathbb{1}\{G_{e,i,t}, \Delta_{A_t} = \Delta_{e,k}\} \frac{\Delta_{e,k}}{\beta_i K} \\
 &\stackrel{(a)}{\leq} \sum_{e \in \tilde{E}} \sum_{i=1}^{\infty} \sum_{t=t_0}^n \sum_{k=1}^{N_e} \mathbb{1}\left\{e \in \tilde{A}_t, T_{t-1}(e) \leq \alpha_i \frac{K^2}{\Delta_{e,k}^2} \log n, \Delta_{A_t} = \Delta_{e,k}\right\} \frac{\Delta_{e,k}}{\beta_i K} \\
 &\stackrel{(b)}{\leq} \sum_{e \in \tilde{E}} \sum_{i=1}^{\infty} \frac{\alpha_i K \log n}{\beta_i} \left[ \Delta_{e,1} \frac{1}{\Delta_{e,1}^2} + \sum_{k=2}^{N_e} \Delta_{e,k} \left( \frac{1}{\Delta_{e,k}^2} - \frac{1}{\Delta_{e,k-1}^2} \right) \right] \\
 &\stackrel{(c)}{<} \sum_{e \in \tilde{E}} \sum_{i=1}^{\infty} \frac{\alpha_i K \log n}{\beta_i} \frac{2}{\Delta_{e,\min}} \\
 &= \sum_{e \in \tilde{E}} K \frac{2}{\Delta_{e,\min}} \left[ \sum_{i=1}^{\infty} \frac{\alpha_i}{\beta_i} \right] \log n,
 \end{aligned}$$

where inequality (a) is by the definition of event  $G_{e,i,t}$ , inequality (b) follows from the solution to:

$$\max_{A_1, \dots, A_n} \sum_{t=t_0}^n \sum_{k=1}^{N_e} \mathbb{1}\left\{e \in \tilde{A}_t, T_{t-1}(e) \leq \alpha_i \frac{K^2}{\Delta_{e,k}^2} \log n, \Delta_{A_t} = \Delta_{e,k}\right\} \frac{\Delta_{e,k}}{\beta_i K},$$

and inequality (c) follows from (16). For the same  $(\alpha_i)$  and  $(\beta_i)$  as in Theorem 4, we have  $\sum_{i=1}^{\infty} \frac{\alpha_i}{\beta_i} < 267$  and it follows that the regret is bounded as:

$$R(n) \leq \mathbb{E} \left[ \hat{R}(n) \right] + \left( \frac{\pi^2}{3} + 1 \right) KL \leq \sum_{e \in \tilde{E}} K \frac{534}{\Delta_{e,\min}} \log n + \left( \frac{\pi^2}{3} + 1 \right) KL.$$

## A.6 Proof of Theorem 6

The key idea is to decompose the regret of CombUCB1 into two parts, where the gaps are larger than  $\epsilon$  and at most  $\epsilon$ . We analyze each part separately and then set  $\epsilon$  to get the desired result.

By Lemma 1, it remains to bound  $\hat{R}(n) = \sum_{t=t_0}^n \Delta_{A_t} \mathbb{1}\{\mathcal{F}_t\}$ , where the event  $\mathcal{F}_t$  is defined in (3). We partition  $\hat{R}(n)$  as:

$$\begin{aligned}
 \hat{R}(n) &= \sum_{t=t_0}^n \Delta_{A_t} \mathbb{1}\{\mathcal{F}_t, \Delta_{A_t} < \epsilon\} + \sum_{t=t_0}^n \Delta_{A_t} \mathbb{1}\{\mathcal{F}_t, \Delta_{A_t} \geq \epsilon\} \\
 &\leq \epsilon n + \sum_{t=t_0}^n \Delta_{A_t} \mathbb{1}\{\mathcal{F}_t, \Delta_{A_t} \geq \epsilon\}
 \end{aligned}$$

and bound the first term trivially. The second term is bounded in the same way as  $\hat{R}(n)$  in the proof of Theorem 5, except that we only consider the gaps  $\Delta_{e,k} \geq \epsilon$ . Therefore,  $\Delta_{e,\min} \geq \epsilon$  and we get:

$$\sum_{t=t_0}^n \Delta_{A_t} \mathbb{1}\{\mathcal{F}_t, \Delta_{A_t} \geq \epsilon\} \leq \sum_{e \in \tilde{E}} K \frac{534}{\epsilon} \log n \leq KL \frac{534}{\epsilon} \log n.$$

Based on the above inequalities:

$$R(n) \leq \frac{534KL}{\epsilon} \log n + \epsilon n + \left( \frac{\pi^2}{3} + 1 \right) KL.$$

Finally, we choose  $\epsilon = \sqrt{\frac{534KL \log n}{n}}$  and get:

$$R(n) \leq 2\sqrt{534KLn \log n} + \left( \frac{\pi^2}{3} + 1 \right) KL < 47\sqrt{KLn \log n} + \left( \frac{\pi^2}{3} + 1 \right) KL,$$

which concludes our proof.

## B Technical Lemmas

**Lemma 4.** Let  $S_i$ ,  $\bar{S}_i$ , and  $m_i$  be defined as in Lemma 3; and  $|S_i| < \beta_i K$  for all  $i > 0$ . Then:

$$\sum_{i=1}^{\infty} \frac{|\bar{S}_i \setminus \bar{S}_{i-1}|}{\sqrt{m_i}} < \sum_{i=1}^{\infty} \frac{(\beta_{i-1} - \beta_i)K}{\sqrt{m_i}}.$$

*Proof.* The lemma is proved as:

$$\begin{aligned} \sum_{i=1}^{\infty} \frac{|\bar{S}_i \setminus \bar{S}_{i-1}|}{\sqrt{m_i}} &= \sum_{i=1}^{\infty} \frac{(|S_{i-1} \setminus S_i|)}{\sqrt{m_i}} \\ &= \sum_{i=1}^{\infty} \frac{(|S_{i-1}| - |S_i|)}{\sqrt{m_i}} \\ &= \frac{|S_0|}{\sqrt{m_1}} + \sum_{i=1}^{\infty} |S_i| \left( \frac{1}{\sqrt{m_{i+1}}} - \frac{1}{\sqrt{m_i}} \right) \\ &< \frac{\beta_0 K}{\sqrt{m_1}} + \sum_{i=1}^{\infty} \beta_i K \left( \frac{1}{\sqrt{m_{i+1}}} - \frac{1}{\sqrt{m_i}} \right) \\ &= \sum_{i=1}^{\infty} (\beta_{i-1} - \beta_i) K \frac{1}{\sqrt{m_i}}. \end{aligned}$$

The first two equalities follow from the definitions of  $\bar{S}_i$  and  $S_i$ . The inequality follows from the facts that  $|S_i| < \beta_i K$  for all  $i > 0$  and  $|S_0| \leq \beta_0 K$ . ■
